# Supplementary material
Source: PubMed Central journal article supplement (PMC7495330)
Supplement: jamasurg-e203672-s003.pdf [file jamasurg-e203672-s003.pdf]

## Data Sharing Statement

Arvieux. Effect of Prophylactic Embolization on Patients With Blunt Trauma at High Risk of Splenectomy. *JAMA Surg*. Published September 16, 2020. 10.1001/jamasurg.2020.3672

### Data

**Data available:** No
